# Supplementary material for: Mucosal microbiome associates with progression to gastric cancer
Source: PubMed Central journal article supplement (PMC8690935; doi:10.7150/thno.65302), 2022-01-01
Supplement: thnov12p0048s1.pdf [file thnov12p0048s1.pdf]

Supplementary Figure 1

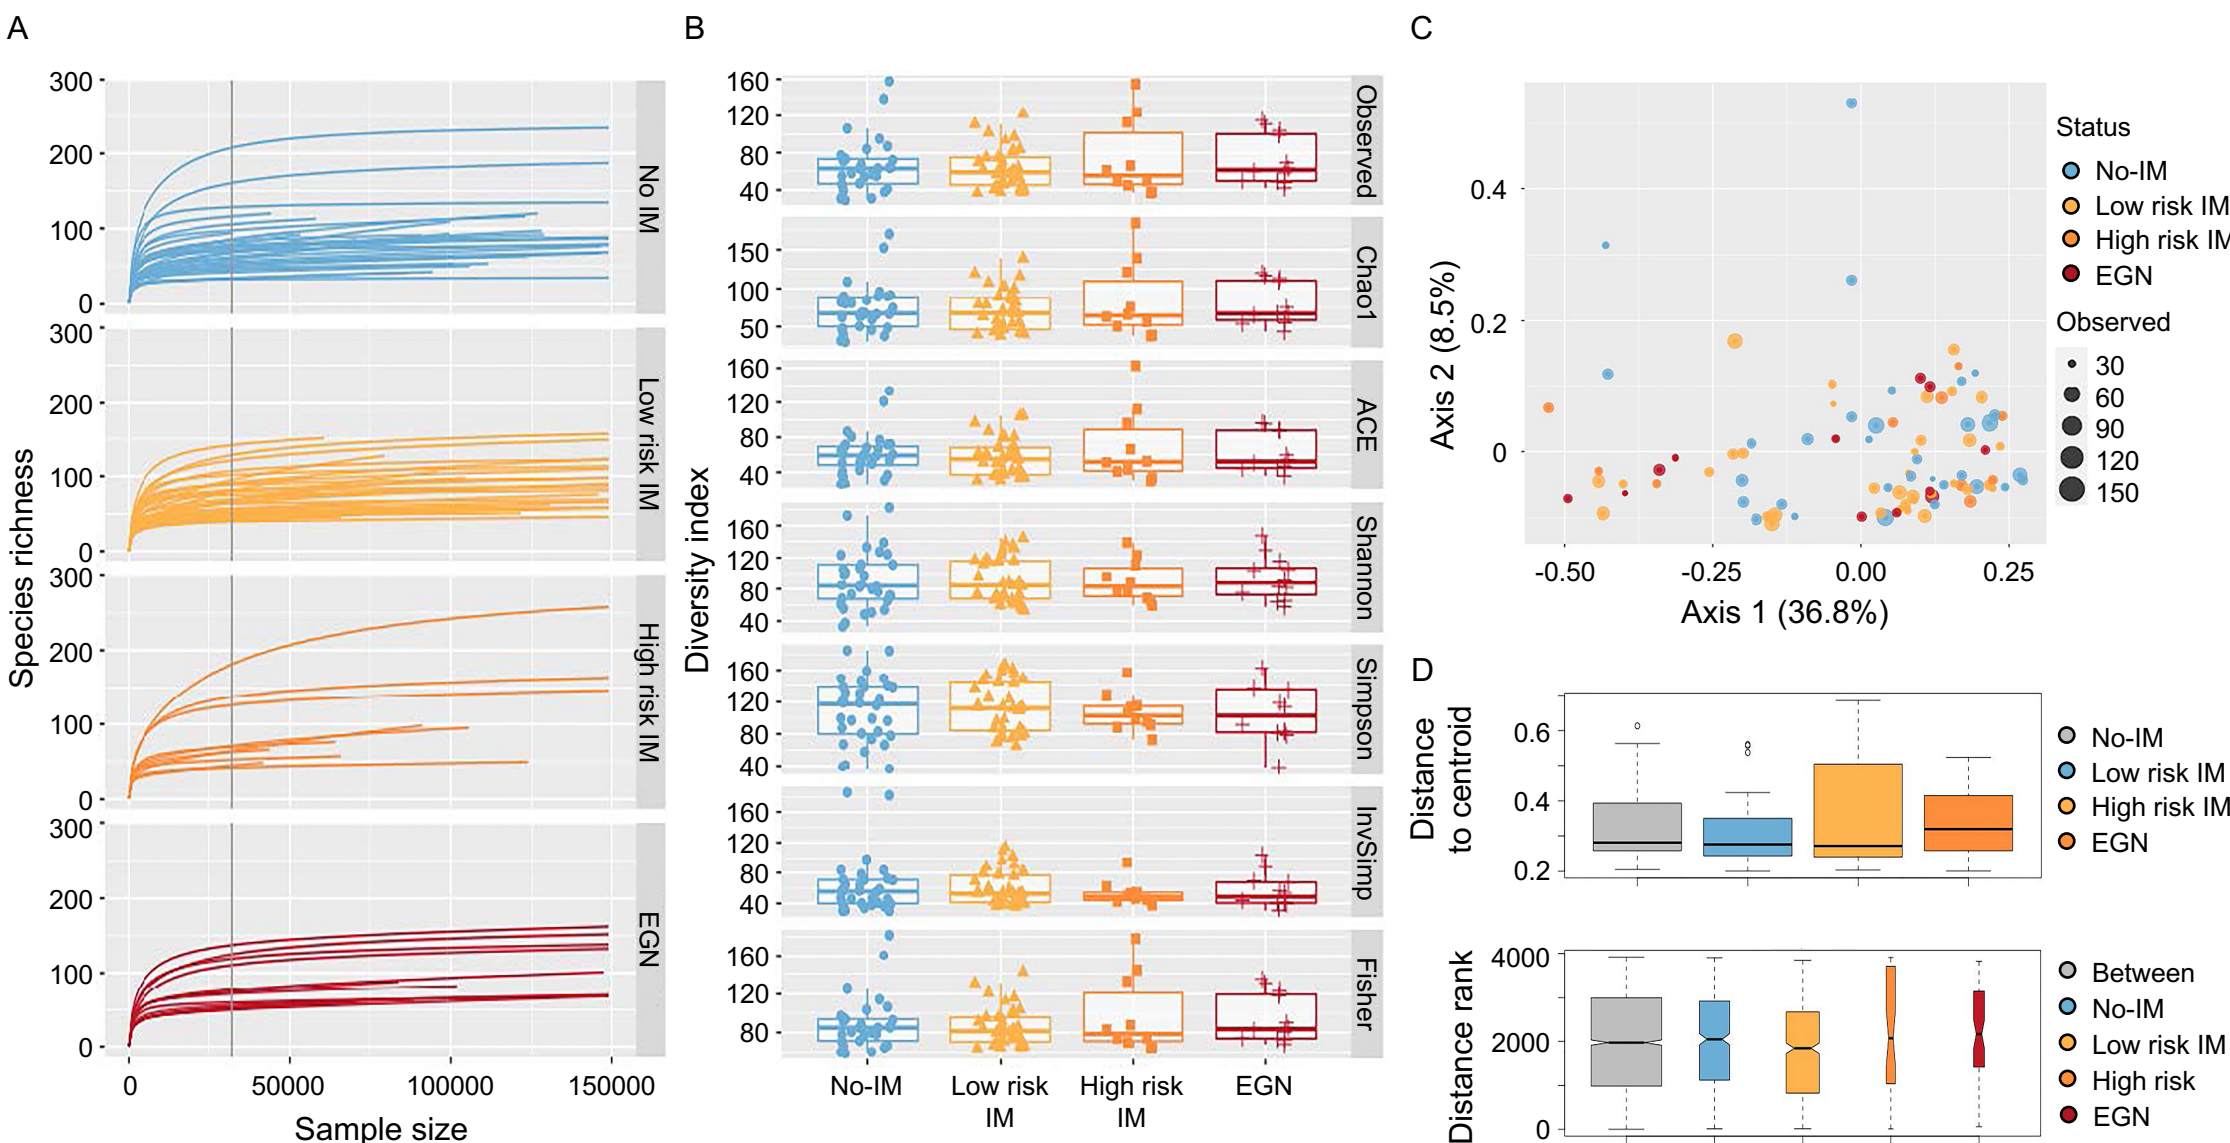

**Supplementary Figure 1. Bacterial alpha and beta diversity were comparable between samples from no IM, IM and EGN patients.** (A & B) Alpha diversity measurement for species richness and diversity. (C) PCoA of bacterial beta diversity based on the Bray-Curtis dissimilarity. (D) Multivariate homogeneity of groups dispersion analysis based on the Bray-Curtis (Top panel, P = 0.719) and ANOSIM based on Bray-Curtis (Bottom panel, P = 0.209)

Supplementary Figure 2

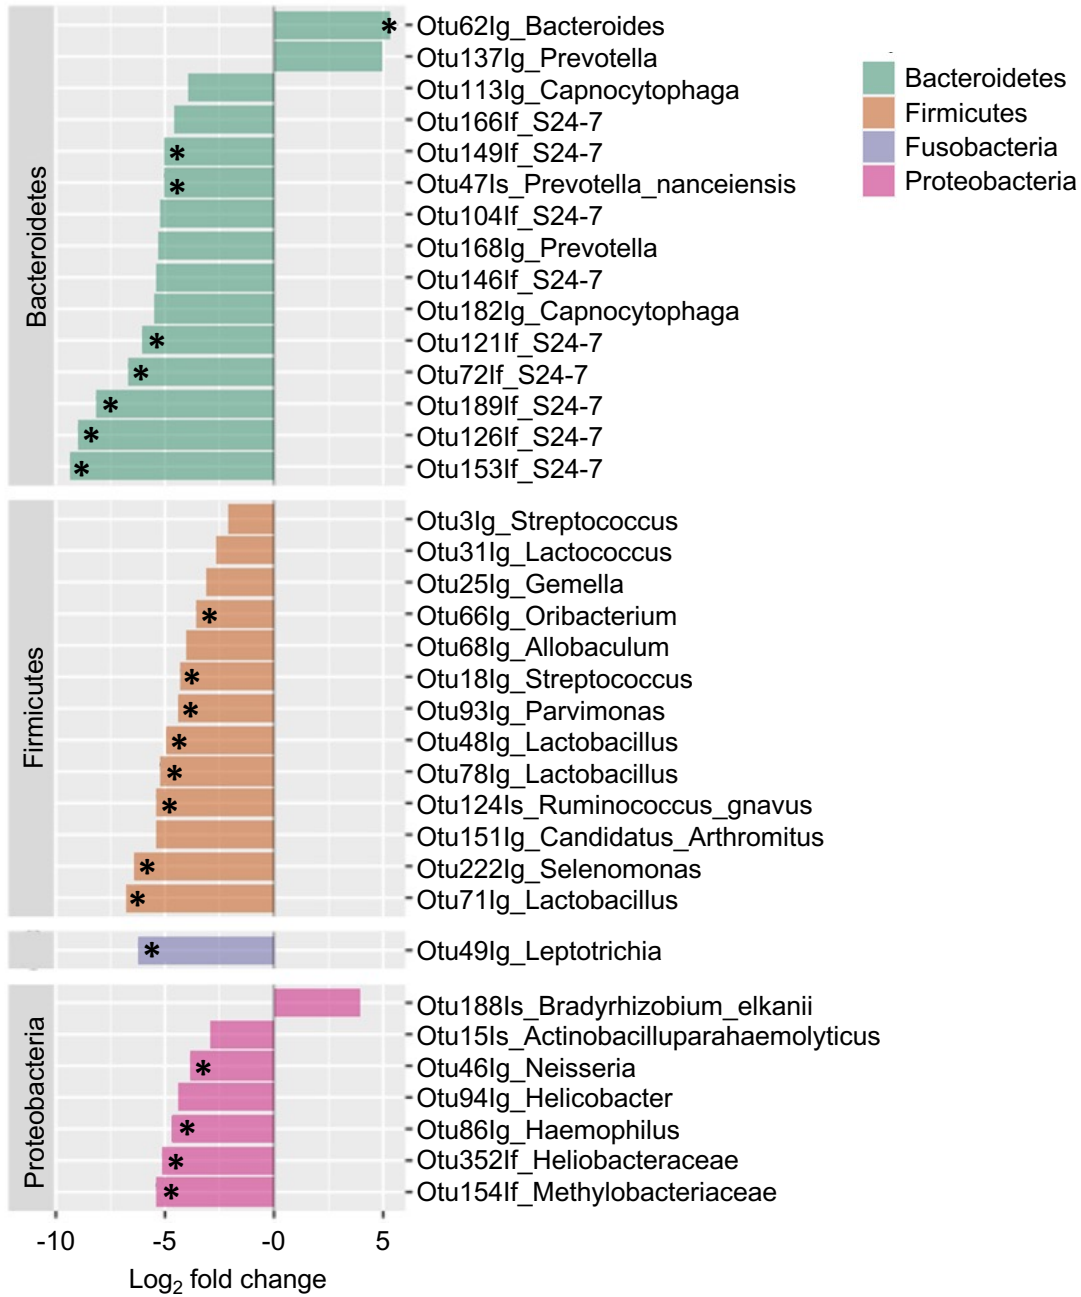

**Supplementary Figure 2. Differentially abundant bacterial OTUs in patients that progressed to IM from no IM (baseline) compared to patients with IM regression.** Bar chart shows the log2 fold change (X-axis) differences in abundance of top bacterial taxa based on Deseq2 univariant analysis. All comparisons P < 0.05, \*denotes Benjamini-Hochberg adjusted P (P<sub>adj</sub>) < 0.1. Of the 20 bacterial OTUs that were significantly associated with IM regression, six were S24-7, which is positivity associated with IM regression and negatively associated with IM progression.
